# Supplementary material
Source: publisher site journal article supplement (https://jhr.pensoft.net/article/48004/download/suppl/31/)
Supplement: Supplementary file 1

Specimen	Sex	Species	Country	L body	L genitalia	L mesotibia	L forewing	W forewing	L hindwing	W hindwing	L scape	W scape	L clava	W clava	L pedicel	L F1	L F2	L F3	L F4	L F5	L F6	L scutel	L propod
	f	O. telenomicida			0.4059	0.4182	0.9840	0.4305	0.7257	0.1722	0.2245	0.0363	0.1415	0.0554	0.0800	0.0431	0.0492	0.0554	0.0584	0.0615	0.0554
	f	O. telenomicida			0.4121	0.4613	1.0086	0.4551	0.7380	0.1691
1	f	O. telenomicida		1.1993	0.4305	0.4490					0.2349	0.0308	0.1476	0.0369	0.0800	0.0431	0.0492	0.0554	0.0554	0.0615	0.0554	0.2030	0.0150
2	f	O. telenomicida			0.3875	0.3998	1.0025	0.4121	0.7103	0.1599	0.2153	0.0246	0.1384	0.0400	0.0738	0.0369	0.0431	0.0523	0.0529	0.0554	0.0523
3	f	O. telenomicida			0.3831	0.4182	0.9840	0.3875	0.6980	0.1415	0.2153	0.0277	0.1476	0.0461	0.0738	0.0400	0.0461	0.0523	0.0566	0.0572	0.0492	0.1850	0.0120
4	f	O. telenomicida			0.3383	0.3708		0.3629	0.6458	0.1242	0.1962	0.0308	0.1353	0.0431	0.0615	0.0369	0.0369	0.0461	0.0480	0.0492	0.0461	0.2060	0.0130
5	f	O. telenomicida			0.3444	0.3383	0.9164	0.3629	0.6027	0.1230	0.1907	0.0277	0.1384	0.0431	0.0664	0.0369	0.0369	0.0400	0.0431	0.0492	0.0474
6	f	O. telenomicida			0.3727	0.3998	1.0332	0.4244	0.6913	0.1568	0.1999	0.0295	0.1384	0.0400	0.0726	0.0338	0.0369	0.0461	0.0492	0.0492	0.0492	0.2030	0.0120
7	f	O. telenomicida			0.3831	0.3998	1.0332	0.3813	0.7066	0.1415	0.2091	0.0271	0.1445	0.0461	0.0738	0.0369	0.0431	0.0523	0.0523	0.0523	0.0523	0.2360	0.0170
8	f	O. telenomicida			0.4182	0.4637	1.1562	0.4982	0.7872	0.1907	0.2614	0.0369	0.1568	0.0431	0.0756	0.0492	0.0510	0.0554	0.0554	0.0646	0.0615	0.2180	0.0120
9	f	O. telenomicida			0.4059	0.4244	1.0824	0.4551	0.7860	0.1784
10	f	O. telenomicida		1.2915	0.3752	0.4182					0.2091	0.0320	0.1384	0.0338	0.0615	0.0369	0.0369	0.0492	0.0492	0.0517	0.0510	0.2030	0.0120
11	m	O. telenomicida		0.8364	0.1753	0.3321					0.1544	0.0246	0.1415	0.0308	0.0492	0.0738	0.0738	0.0738	0.0738	0.0738	0.0646
	m	O. telenomicida									0.1415	0.0492					0.0800	0.0738	0.0738	0.0769
	f	O. telenomicida	Russia		0.4059	0.4182	0.984	0.4305	0.7257	0.1722	0.224475	0.036285	0.14145	0.05535	0.07995	0.04305	0.0492	0.05535	0.058425	0.0615	0.05535
	f	O. telenomicida	Russia		0.41205	0.46125	1.0086	0.4551	0.7380	0.169125
	m	O. telenomicida	Russia										0.14145	0.0492			0.0800	0.0738	0.0738	0.0769
NEOTYPE	f	O.telenomicida	Romania		0.3856	0.3998	0.9041	0.3690	0.6700	0.1230	0.20295	0.033825	0.144525	0.048585	0.0720	0.04305	0.0431	0.0492	0.0492	0.0554	0.0492	0.2030	0.0120
Topotype	f	O. telenomicida	Romania	0.9779	0.3690	0.3998	0.9656	0.3875	0.4059	0.1230	0.206025	0.02583	0.14637	0.04305	0.06765	0.04305	0.0431	0.0492	0.0492	0.0523	0.0535	0.2060	0.0150
2	f	O. mirus	Pakistan		0.3444	0.3518	0.8518	0.3506	0.5898	0.0879	0.19065	0.033825	0.1353	0.04305	0.06765	0.0369	0.0369	0.0455	0.0461	0.0455	0.0431	0.1760	0.0090
3	f	O. mirus	Pakistan		0.3198	0.3444	0.8303	0.3567	0.5898	0.1230	0.193725	0.03075	0.1353	0.0369	0.06765	0.0369	0.0369	0.0461	0.0437	0.0437	0.0437	0.1670	0.0090
4	f	O. mirus	Pakistan		0.3567	0.3506	0.8426	0.3567	0.5830	0.1230	0.19065	0.03075	0.12915	0.039975	0.06765	0.0369	0.0369	0.0431	0.0492	0.0431	0.0461	0.1810	0.0100
5	f	O. mirus	Pakistan		0.3321	0.3506	0.8487	0.3629	0.5959	0.1230	0.19065	0.03075	0.129765	0.0369	0.0615	0.0369	0.0369	0.0369	0.0449	0.0461	0.0437	0.1820	0.0100
6	f	O. mirus	Pakistan		0.3198	0.3444	0.8487	0.3629	0.5904	0.1230	0.19065	0.027675	0.132225	0.03567	0.06765	0.035055	0.0357	0.0455	0.0461	0.0449	0.0437	0.1760	0.0100
7	f	O. mirus	Pakistan		0.3456	0.3690	0.8733	0.3813	0.6261	0.1292	0.1968	0.03075	0.13653	0.04182	0.06765	0.0400	0.0400	0.0431	0.0510	0.0486	0.0443	0.1880	0.0100
8	f	O. mirus	Pakistan		0.2897	0.2860	0.7011	0.2829	0.4613	0.0984	0.16605	0.0246	0.118695	0.0369	0.05781	0.027675	0.0277	0.0338	0.0400	0.0400	0.0400	0.1450	0.0060
9	f	O. mirus	Pakistan		0.3014	0.3137	0.7934	0.3260	0.5443	0.1169	0.176505	0.027675	0.12915	0.04305	0.064575	0.03075	0.0308	0.0375	0.0394	0.0455	0.0492	0.1540	0.0090
10	f	O. mirus	Pakistan		0.3057	0.3321	0.8303	0.3598	0.5843	0.1292	0.1845	0.02952	0.1353	0.04305	0.06642	0.033825	0.0308	0.0363	0.0443	0.0449	0.0504	0.1700	0.0090
11	m	O. mirus	Pakistan		0.1907		0.7688	0.3444			0.156825	0.04305
12	m	O. mirus	Pakistan		0.1722		0.7257	0.3167			0.14268	0.04182
13	m	O. mirus	Pakistan	0.9594	0.1722		0.7134	0.3014			0.14145	0.0369
14	m	O. mirus	Pakistan	0.9471	0.1876		0.7411	0.3383
